# Supplementary material
Source: PubMed Central journal article supplement (PMC7249479)
Supplement: Supp_Table1.pdf [file Supp_Table1.pdf]

# Supplementary Data

SUPPLEMENTARY TABLE S1. COBRIT BASELINE PATIENT FEATURES INCLUDED IN UNSUPERVISED LEARNING ANALYSIS

| <i>Feature category</i> | <i>Feature name</i>         | <i>Raw data format</i>                                                                                                                                                                    | <i>Cleaned data format (dummy coded where more than 2 values)</i>             | <i>Number of missing values (type of missingness)</i> | <i>Imputed values (if any)</i> | <i>Included or excluded in data set</i> |
|-------------------------|-----------------------------|-------------------------------------------------------------------------------------------------------------------------------------------------------------------------------------------|-------------------------------------------------------------------------------|-------------------------------------------------------|--------------------------------|-----------------------------------------|
| Demographics            | Age                         | Numerical                                                                                                                                                                                 | Numerical                                                                     | 0                                                     | None                           | Included                                |
|                         | Gender                      | Female; male                                                                                                                                                                              | Female; male                                                                  | 0                                                     | None                           | Included                                |
|                         | Hand preference             | Both hands; left hand; right hand                                                                                                                                                         | Right-handed; left-handed                                                     | 73 (MCAR)                                             | MI                             | Included                                |
|                         | Marital partner status      | Divorced or separated; married (common or civil law); single                                                                                                                              | Single; married; divorced/widowed                                             | 1 (MCAR)                                              | MI                             | Included                                |
|                         | Pre-injury living situation | Homeless/lives in shelter; lives alone; lives in a group home/assisted living; lives with friend(s) or roommate(s) or co-habiting; lives with spouse and/or other family member(s); other | Alone; with family; co-habiting                                               | 2 (MCAR)                                              | MI                             | Included                                |
|                         | Pre-injury employment       | Employed full-time; employed part-time; full-time student (and unemployed); homemaker; part-time student (and unemployed); retired; unemployed/disabled                                   | Employed; unemployed                                                          | 13 (MCAR)                                             | MI                             | Included                                |
|                         | U.S. education level        | College graduate; graduate school completed; high school graduate/GED; none; some college; some elementary school; some graduate school; some high school; technical                      | High school or less; some college or trade school; college graduate or higher | 19 (MCAR)                                             | MI                             | Included                                |
|                         | Race                        | American Indian or Alaskan Native; Asian; black or African American; more than one race; Native Hawaiian or other Pacific Islander; white                                                 | White; black; another race                                                    | 5 (MCAR)                                              | MI                             | Included                                |
|                         | Ethnicity                   | Hispanic; non-Hispanic                                                                                                                                                                    | Hispanic; non-Hispanic                                                        | 0                                                     | MI                             | Included                                |
|                         | Annual income pre-injury    | \$10,000–\$29,999 per year; \$30,000–\$49,999 per year; \$50,000–\$99,999 per year; < \$10,000 per year; > \$100,000 per year; none                                                       | None                                                                          | 593 (MNAR)                                            | MI                             | Excluded                                |

(continued)

SUPPLEMENTARY TABLE S1. (CONTINUED)

| <i>Feature category</i>                       | <i>Feature name</i>                     | <i>Raw data format</i>     | <i>Cleaned data format (dummy coded where more than 2 values)</i>                                                                                                                                                                                                                                                   | <i>Number of missing values (type of missingness)</i>                                       | <i>Imputed values (if any)</i> | <i>Included or excluded in data set</i> |          |
|-----------------------------------------------|-----------------------------------------|----------------------------|---------------------------------------------------------------------------------------------------------------------------------------------------------------------------------------------------------------------------------------------------------------------------------------------------------------------|---------------------------------------------------------------------------------------------|--------------------------------|-----------------------------------------|----------|
| Medical history<br>(3 months prior to injury) | Cardiovascular disease                  | Yes; No                    | Yes; No                                                                                                                                                                                                                                                                                                             | 9 (MCAR)                                                                                    | MI                             | Included                                |          |
|                                               | Chronic headache/migraine               | Yes; No                    | Yes; No                                                                                                                                                                                                                                                                                                             | 10 (MCAR)                                                                                   | MI                             | Included                                |          |
|                                               | Diabetes                                | Yes; No                    | Yes; No                                                                                                                                                                                                                                                                                                             | 8 (MCAR)                                                                                    | MI                             | Included                                |          |
|                                               | HIV infection                           | Yes; No                    | Yes; No                                                                                                                                                                                                                                                                                                             | 10 (MCAR)                                                                                   | MI                             | Included                                |          |
|                                               | Hard of hearing                         | Yes; No                    | Yes; No                                                                                                                                                                                                                                                                                                             | 9 (MCAR)                                                                                    | MI                             | Included                                |          |
|                                               | Hepatitis                               | Yes; No                    | Yes; No                                                                                                                                                                                                                                                                                                             | 11 (MCAR)                                                                                   | MI                             | Included                                |          |
|                                               | Learning disability (ADHD/dyslexia)     | Yes; No                    | Yes; No                                                                                                                                                                                                                                                                                                             | 9 (MCAR)                                                                                    | MI                             | Included                                |          |
|                                               | Non-CNS malignancy                      | Yes; No                    | Yes; No                                                                                                                                                                                                                                                                                                             | 10 (MCAR)                                                                                   | MI                             | Included                                |          |
|                                               | Previous TBI                            | Yes; No                    | Yes; No                                                                                                                                                                                                                                                                                                             | 9 (MCAR)                                                                                    | MI                             | Included                                |          |
|                                               | Renal failure                           | Yes; No                    | Yes; No                                                                                                                                                                                                                                                                                                             | 9 (MCAR)                                                                                    | MI                             | Included                                |          |
|                                               | Respiratory disease                     | Yes; No                    | Yes; No                                                                                                                                                                                                                                                                                                             | 7 (MCAR)                                                                                    | MI                             | Included                                |          |
|                                               | Seizures                                | Yes; No                    | Yes; No                                                                                                                                                                                                                                                                                                             | 9 (MCAR)                                                                                    | MI                             | Included                                |          |
|                                               | Treated hypertension                    | Yes; No                    | Yes; No                                                                                                                                                                                                                                                                                                             | 8 (MCAR)                                                                                    | MI                             | Included                                |          |
|                                               | Treated psychiatric problem             | Yes; No                    | Yes; No                                                                                                                                                                                                                                                                                                             | 9 (MCAR)                                                                                    | MI                             | Included                                |          |
|                                               | Another condition                       | Yes; No                    | Yes; No                                                                                                                                                                                                                                                                                                             | 11 (MCAR)                                                                                   | MI                             | Included                                |          |
|                                               | Medication use 3 months prior to injury | Yes; No                    | Yes; No                                                                                                                                                                                                                                                                                                             | 98 (MNAR)                                                                                   | None                           | Excluded                                |          |
|                                               | Injury information                      | Mechanism of injury        | Assault; fall from a moving object (bike/skateboard/horse); fall from stationary object (roof/ladder); individual struck by any type of vehicle; motor vehicle (driver/passenger); motorcycle/ATV/golf cart (driver/passenger); sports (football/gymnastics); struck on head by object, not assault (tree); assault | Motor vehicle; fall; other                                                                  | 0                              | None                                    | Included |
|                                               |                                         | Time of injury (24h clock) | 00:00–02:59; 03:00–05:59; 06:00–08:59; 09:00–11:59; 12:00–14:59; 15:00–17:59; 18:00–20:59; 21:00–23:59                                                                                                                                                                                                              | Early morning: 0:00–5:59; Morning: 6:00–11:59; afternoon: 12:00–17:59; evening: 18:00–11:59 | 0                              | None                                    | Included |

(continued)

SUPPLEMENTARY TABLE S1. (CONTINUED)

| <i>Feature category</i>                | <i>Feature name</i>                        | <i>Raw data format</i>                                                                                                                                                                                | <i>Cleaned data format (dummy coded where more than 2 values)</i> | <i>Number of missing values (type of missingness)</i> | <i>Imputed values (if any)</i> | <i>Included or excluded in data set</i> |          |
|----------------------------------------|--------------------------------------------|-------------------------------------------------------------------------------------------------------------------------------------------------------------------------------------------------------|-------------------------------------------------------------------|-------------------------------------------------------|--------------------------------|-----------------------------------------|----------|
| Computed tomography (CT)               | Epidural lesion anatomic site              | Left supratentorial; no epidural areas involved; posterior fossa; right supratentorial                                                                                                                | Dummy coded each anatomic site                                    | 0                                                     | None                           | Included                                |          |
|                                        | Epidural lesion volume category            | No involvement; ≤ 25 cc; > 25cc; evacuated                                                                                                                                                            | No involvement; ≤ 25 cc; > 25cc; evacuated                        | 328 (MAR)                                             | MI                             | Included                                |          |
|                                        | Intraparenchymal lesion anatomic site      | Brainstem/diencephalon/CC; cerebellar; left frontal; left occipital; left parietal; left temporal; no intraparenchymal areas involved; right frontal; right occipital; right parietal; right temporal | Dummy coded each anatomic site                                    | 0                                                     | None                           | Included                                |          |
|                                        | Intraparenchymal lesion volume category    | No involvement; ≤ 25 cc; > 25cc                                                                                                                                                                       | No involvement; ≤ 25 cc; > 25cc                                   | 328 (MAR)                                             | MI                             | Included                                |          |
|                                        | Lesions of high or mixed density indicator | Absent; present                                                                                                                                                                                       | Absent; present                                                   | 0                                                     | None                           | Included                                |          |
|                                        | Mesencephalic cisterns type                | Abnormal - blood in cisterns but no compression; abnormal - effaced/compressed but visible (regardless if there is blood); abnormal - obliterated/absent (regardless if there is blood); normal       | Abnormal; normal                                                  | 0                                                     | None                           | Included                                |          |
|                                        | Midline shift measurement category         | None; 0–5 mm; 6–10 mm; > 10 mm                                                                                                                                                                        | None; 0–5 mm; 6–10 mm; > 10 mm                                    | 4 (MAR)                                               | MI                             | Included                                |          |
|                                        | Subarachnoid hemorrhage type               | Absent; present cisterns only; present convexities/sulci and cisterns; present convexities/sulci only                                                                                                 | Absent; present                                                   | 0                                                     | None                           | Included                                |          |
|                                        | Subdural lesion anatomic site              | Falcine; interhemispheric; left supratentorial; no subdural areas involved; posterior fossa; right supratentorial; tentorial                                                                          | Dummy coded each anatomic site                                    | 0                                                     | None                           | Included                                |          |
|                                        | Subdural lesion volume category            | No involvement; ≤ 25 cc; > 25 cc; evacuated                                                                                                                                                           | No involvement; ≤ 25 cc; > 25 cc; evacuated                       | 328 (MAR)                                             | MI                             | Included                                |          |
|                                        | Hydrocephalus present indicator            | Yes; no                                                                                                                                                                                               | Yes; No                                                           | 0                                                     | None                           | Included                                |          |
|                                        | Intraventricular hemorrhage status         | Absent; indeterminate; pre-morbid; present                                                                                                                                                            | Absent; present                                                   | 0                                                     | None                           | Included                                |          |
|                                        | Laboratory tests                           | Platelets (1000/ $\mu$ L)                                                                                                                                                                             | Numerical                                                         | Numerical                                             | 8 (MCAR)                       | MI                                      | Included |
|                                        |                                            | Hemoglobin (g/dL)                                                                                                                                                                                     | Numerical                                                         | Numerical                                             | 5 (MCAR)                       | MI                                      | Included |
| Hematocrit (%)                         |                                            | Numerical                                                                                                                                                                                             | Numerical                                                         | 6 (MCAR)                                              | MI                             | Included                                |          |
| White blood cell count (1000/ $\mu$ L) |                                            | Numerical                                                                                                                                                                                             | Numerical                                                         | 7 (MCAR)                                              | MI                             | Included                                |          |

(continued)

SUPPLEMENTARY TABLE S1. (CONTINUED)

| <i>Feature category</i> | <i>Feature name</i>                       | <i>Raw data format</i>                                    | <i>Cleaned data format (dummy coded where more than 2 values)</i>                 | <i>Number of missing values (type of missingness)</i> | <i>Imputed values (if any)</i>                                       | <i>Included or excluded in data set</i> |
|-------------------------|-------------------------------------------|-----------------------------------------------------------|-----------------------------------------------------------------------------------|-------------------------------------------------------|----------------------------------------------------------------------|-----------------------------------------|
|                         | Absolute neutrophil count (1000/ $\mu$ L) | Numerical                                                 | Replaced with indicator feature for completion of differential blood test         | 308 (MNAR)                                            | None                                                                 | Excluded                                |
|                         | Neutrophils (%)                           | Numerical (%)                                             | Replaced with indicator feature for completion of differential blood test         | 373 (MNAR)                                            | None                                                                 | Excluded                                |
|                         | Absolute lymphocyte count (1000/ $\mu$ L) | Numerical                                                 | Replaced with indicator feature for completion of differential blood test         | 275 (MNAR)                                            | None                                                                 | Excluded                                |
|                         | Lymphocytes (%)                           | Numerical (%)                                             | Replaced with indicator feature for completion of differential blood test         | 341 (MNAR)                                            | None                                                                 | Excluded                                |
|                         | Creatinine (mg/dL)                        | Numerical                                                 | Numerical                                                                         | 16 (MCAR)                                             | MI                                                                   | Included                                |
|                         | Glucose (mg/dL)                           | Numerical                                                 | Numerical                                                                         | 7 (MCAR)                                              | MI                                                                   | Included                                |
|                         | Potassium (mM/L)                          | Numerical                                                 | Numerical                                                                         | 5 (MCAR)                                              | MI                                                                   | Included                                |
|                         | Sodium (mM/L)                             | Numerical                                                 | Numerical                                                                         | 3 (MCAR)                                              | MI                                                                   | Included                                |
|                         | Aspartate aminotransferase (IU/L)         | Numerical                                                 | None                                                                              | 105 (MNAR)                                            | Replaced with indicator feature for completion of hepatic blood test | Excluded                                |
|                         | Alanine aminotransferase (IU/L)           | Numerical                                                 | None                                                                              | 127 (MNAR)                                            | Replaced with indicator feature for completion of hepatic blood test | Excluded                                |
|                         | Bilirubin (mg/dL)                         | Numerical; highest and lowest daily measurements recorded | None                                                                              | 517 (MNAR)                                            | Replaced with indicator feature for completion of hepatic blood test | Excluded                                |
|                         | Lactate (mEq/L)                           | Numerical; highest and lowest daily measurements recorded | None                                                                              | 420 (MNAR)                                            | Replaced with indicator feature for completion of bilirubin test     | Excluded                                |
| Baseline Assessments    | Weight (kg)                               | Numerical                                                 | Numerical                                                                         | 5 (MCAR)                                              | MI                                                                   | Included                                |
|                         | Clinical signs of neuroworsening          | Yes; no                                                   | Numerical                                                                         | 20 (MNAR)                                             | MI                                                                   | Excluded                                |
|                         | Transfusion                               | Yes; No                                                   | Yes; No                                                                           | 1 (MCAR)                                              | MI                                                                   | Included                                |
|                         | Ins/outs- total volume in (mL)            | Numerical                                                 | Numerical; combined with total volume out to create net fluid intake (mL) feature | 37 (MCAR)                                             | MI                                                                   | Included                                |

(continued)

SUPPLEMENTARY TABLE S1. (CONTINUED)

| <i>Feature category</i> | <i>Feature name</i>                 | <i>Raw data format</i>                                    | <i>Cleaned data format (dummy coded where more than 2 values)</i>                 | <i>Number of missing values (type of missingness)</i> | <i>Imputed values (if any)</i> | <i>Included or excluded in data set</i> |
|-------------------------|-------------------------------------|-----------------------------------------------------------|-----------------------------------------------------------------------------------|-------------------------------------------------------|--------------------------------|-----------------------------------------|
|                         | Ins/outs- total volume out (mL)     | Numerical                                                 | Numerical; combined with total volume out to create net fluid intake (mL) feature | 56 (MCAR)                                             | MI                             | Included                                |
|                         | Temperature (Celsius)               | Numerical; highest and lowest daily measurements recorded | Numerical; daily average of high/low measurements                                 | 9 (MCAR)                                              | MI                             | Included                                |
|                         | Systolic blood pressure (mmHg)      | Numerical; highest and lowest daily measurements recorded | Numerical; daily average of high/low measurements                                 | 1 (MCAR)                                              | MI                             | Included                                |
|                         | Diastolic blood pressure (mmHg)     | Numerical; highest and lowest daily measurements recorded | Numerical; daily average of high/low measurements                                 | 13 (MCAR)                                             | MI                             | Included                                |
|                         | Heart rate (BPM)                    | Numerical; highest and lowest measurements recorded       | Numerical; daily average of high/low measurements                                 | 3 (MCAR)                                              | MI                             | Included                                |
|                         | Respiratory rate (RPM)              | Numerical; highest and lowest measurements recorded       | Numerical; daily average of high/low measurements                                 | 6 (MCAR)                                              | MI                             | Included                                |
|                         | Blood oxygen saturation level (%)   | Numerical; Highest and lowest daily measurements recorded | Numerical; daily average of high/low measurements                                 | 7 (MCAR)                                              | MI                             | Included                                |
|                         | PaO <sub>2</sub> (mmHg)             | Numerical; highest and lowest daily measurements recorded | Replaced with indicator feature for completion of arterial blood gas test         | 525 (MNAR)                                            | None                           | Excluded                                |
|                         | PCO <sub>2</sub> (mmHg)             | Numerical; highest and lowest daily measurements recorded | Replaced with indicator feature for completion of arterial blood gas test         | 504 (MNAR)                                            | None                           | Excluded                                |
|                         | FiO <sub>2</sub> (%)                | Numerical; highest and lowest daily measurements recorded | Replaced with indicator feature for completion of arterial blood gas test         | 441 (MNAR)                                            | None                           | Excluded                                |
|                         | Arterial pH                         | Numerical; highest and lowest daily measurements recorded | Replaced with indicator feature for completion of arterial blood gas test         | 504 (MNAR)                                            | None                           | Excluded                                |
|                         | Prothrombin time (sec)              | Numerical; highest and lowest daily measurements recorded | Numerical; daily average of high/low measurements                                 | 27 (MCAR)                                             | MI                             | Included                                |
|                         | Partial thromboplastin time (sec)   | Numerical; highest and lowest daily measurements recorded | Numerical; daily average of high/low measurements                                 | 30 (MCAR)                                             | MI                             | Included                                |
|                         | PT international normalized ratio   | Numerical; highest and lowest daily measurements recorded | Numerical; daily average of high/low measurements                                 | 28 (MCAR)                                             | MI                             | Included                                |
|                         | Toxicology drug screen completed    | Yes; no                                                   | Yes; no                                                                           | 356 (MAR)                                             | MI                             | Included                                |
|                         | Toxicology alcohol screen completed | Yes; no                                                   | Yes; no                                                                           | 161 (MAR)                                             | MI                             | Included                                |
|                         | Drug screen: amphetamines           | Positive; negative                                        | Positive; negative                                                                | 440 (MNAR)                                            | None                           | Excluded                                |
|                         | Drug screen: barbiturates           | Positive; negative                                        | Positive; negative                                                                | 391 (MNAR)                                            | None                           | Excluded                                |
|                         | Drug screen: benzo-diazapines       | Positive; negative                                        | Positive; negative                                                                | 391 (MNAR)                                            | None                           | Excluded                                |

(continued)

SUPPLEMENTARY TABLE S1. (CONTINUED)

| <i>Feature category</i> | <i>Feature name</i>                 | <i>Raw data format</i> | <i>Cleaned data format (dummy coded where more than 2 values)</i> | <i>Number of missing values (type of missingness)</i> | <i>Imputed values (if any)</i> | <i>Included or excluded in data set</i> |
|-------------------------|-------------------------------------|------------------------|-------------------------------------------------------------------|-------------------------------------------------------|--------------------------------|-----------------------------------------|
| Study treatment arm     | Drug screen: cocaine (BZE)          | Positive; negative     | Positive; negative                                                | 447 (MNAR)                                            | None                           | Excluded                                |
|                         | Drug screen: marijuana (THC)        | Positive; negative     | Positive; negative                                                | 719 (MNAR)                                            | None                           | Excluded                                |
|                         | Drug screen: methadone              | Positive; negative     | Positive; negative                                                | 856 (MNAR)                                            | None                           | Excluded                                |
|                         | Drug screen: methamphetamine amines | Positive; negative     | Positive; negative                                                | 895 (MNAR)                                            | None                           | Excluded                                |
|                         | Drug screen: opiates                | Positive; negative     | Positive; negative                                                | 453 (MNAR)                                            | None                           | Excluded                                |
|                         | Drug screen: phencyclidine (PCP)    | Positive; negative     | Positive; negative                                                | 550 (MNAR)                                            | None                           | Excluded                                |
|                         | Drug screen: another drug           | Positive; negative     | Positive; negative                                                | 899 (MNAR)                                            | None                           | Excluded                                |
|                         | Treatment arm                       | Citicoline; placebo    | Citicoline; placebo                                               | 0                                                     | None                           | Included                                |

Baseline patient features that were collected within 24h of injury were input into unsupervised machine learning schema. (Column 1) Baseline feature category, (Column 2) feature name, (Column 3) feature values in the raw data format (categorical features were dummy coded if feature contained >2 values), (Column 4) feature values in the cleaned data format, (Column 5) number of missing values in the original data set with the type of missingness indicated in parentheses, (Column 6) method of imputing missing values, and (Column 7) whether the feature was included in the final data set.

COBRIT, Citicoline Brain Injury Treatment Trial; MAR, missing at random; MCAR, missing completely at random; MNAR, missing not at random; MI, multiple imputation with random forest method; GED, general education diploma; ADHD, attention-deficit/hyperactivity disorder; CNS, central nervous system; TBI, traumatic brain injury; ATV, all-terrain vehicle; CC,; BPM, beats per minute; RPM, respirations per minute; BZE, benzodiazepines; THC, tetrahydrocannabinol.
